# Supplementary material for: Biomass pyrolysis with a Fe-Ni-CaO char-based catalyst for efficient green hydrogen generation and bio-oil upgrading via coupled –H/O–H activation
Source: Royal Society of Chemistry journal article supplement (doi:10.1039/d5ta09566b), 2026-01-01
Supplement: d5ta09566b1.pdf [file d5ta09566b1.pdf]

**Supplementary material**

***Biomass pyrolysis with Fe-Ni-CaO char-based catalyst for  
efficient green hydrogen generation and bio-oil upgrading via  
coupled C–H/O–H activation***

Qiuxiang Lu<sup>1</sup>, Yao Wang<sup>1</sup>, Qi Cao, Gang Wu, Huiyan Zhang\*

*Key Laboratory of Energy Thermal Conversion and Control of Ministry of Education,  
School of Energy and Environment, Southeast University, Nanjing 210096, PR China*

<sup>1</sup> These two authors contributed equally to the work.

\* Corresponding author: *Huiyan Zhang (H.Z.)*.

*E-mail address: [hyzhang@seu.edu.cn](mailto:hyzhang@seu.edu.cn)*

**The PDF file includes:**

**Supplementary Text**

**Figs. S1 to S20**

**Tables S1 to S3**

21 *Supplementary Text*

22

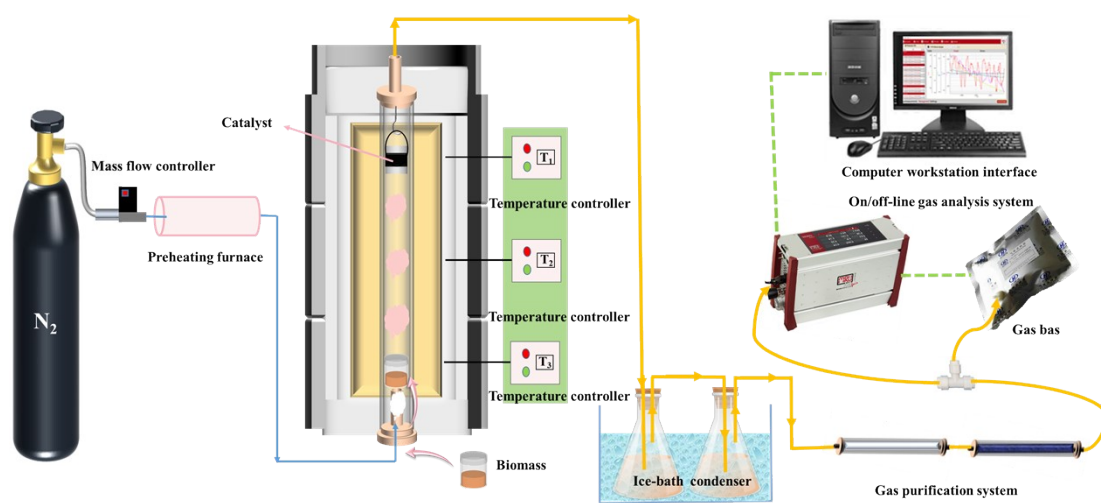

23

24 **Supplementary Fig. 1. Schematic diagram of catalytic reforming of biomass**  
25 **pyrolysis tar to hydrogen.**

26

27

28

29

30

31

32

33

34

35

36

37

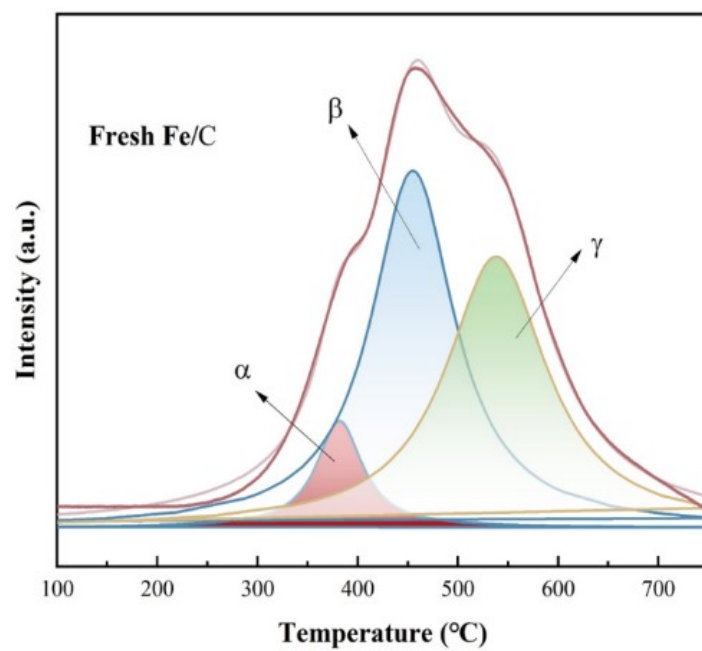

38

39 **Supplementary Fig. 2. Reduction characteristics of the catalyst ( $\text{H}_2$ -TPR of fresh**

40 **Fe/C, which shows three reduction peaks,  $\text{Fe}_2\text{O}_3 \rightarrow \text{Fe}_3\text{O}_4 \rightarrow \text{FeO} \rightarrow \text{Fe}$ ).**

41

42

43

44

45

46

47

48

49

50

51

52

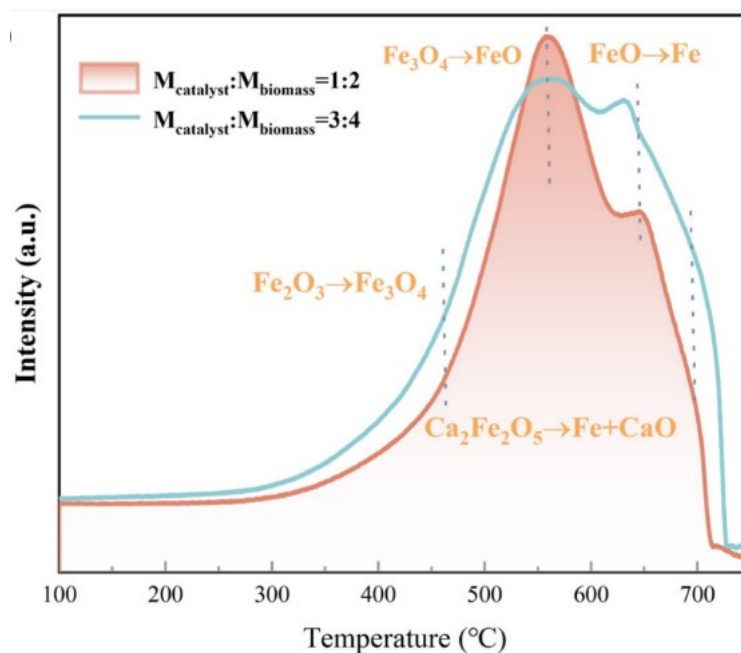

53

54 **Supplementary Fig. 3. Reduction characteristics of the spent Fe/C catalyst.**

55

56 As can be seen in Fig. 3, changing the ratio of catalyst to biomass has little effect  
 57 on the peak shape of the reduction peak, the difference being that increasing the  
 58 amount of catalyst results in a flatter positional curve of the reduction peak, which can  
 59 be attributed to the high content of +2 and +3 valent iron in the catalyst.

60

61

62

63

64

65

66

67

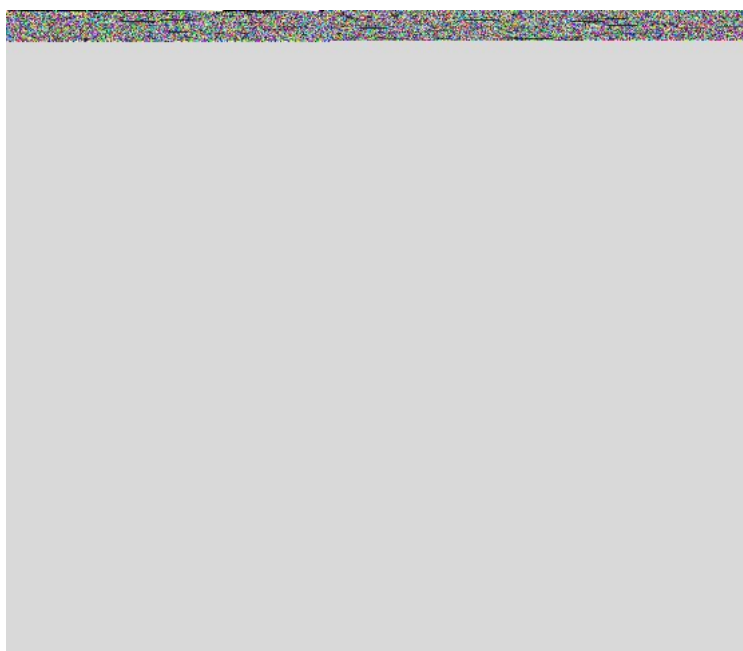

68

69 **Supplementary Fig. 4. Reduction characteristics of the spent Fe/C catalyst.**

70

71 From the Fig. 4, it can be seen that when the ratio of catalyst to biomass is 3:4,  
72 the position curves of the first and second reduction peaks are flatter, which can be  
73 attributed to the higher content of  $\text{Fe}_3\text{O}_4$  in the catalyst. Again, the third reduction  
74 peak has an earlier reduction temperature and a sharp peak shape, which indicates that  
75 there is less iron content in the +2, which is rapidly reduced in a short period of time.  
76 Meanwhile, the curve of the last hydrogen reduction peak is also flat, which is  
77 attributed to the presence of a large amount of Fe-Ca compounds in the catalyst. The  
78 peak shape of the hydrogen reduction peak when the mass ratio of the two is 1:2 is  
79 sharper showing a volcano shape and the temperature range of the reduction curve is  
80 narrower, which indicates that the valence of iron species in this catalyst is  
81 concentrated in +2 and +3.

82

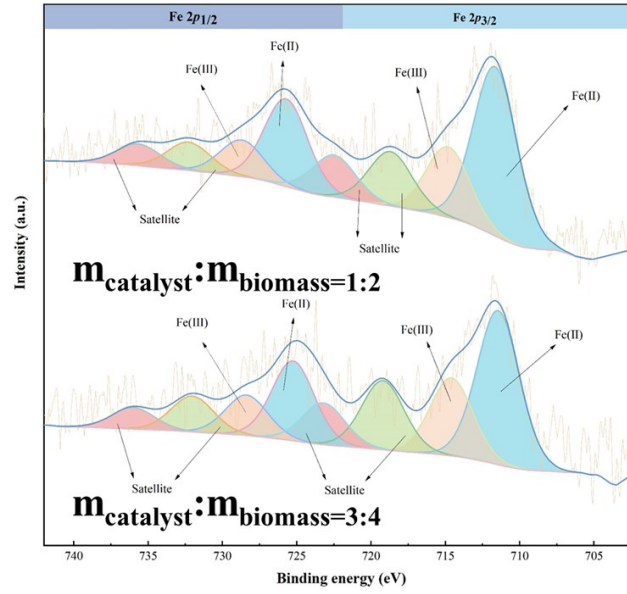

83

84 **Supplementary Fig. 5. Fe 2p evolution of spent Fe-CaO/C catalyst.**

85

86 In Fe 2p spectra, the peaks at 710.8 and 726.4 eV, 715.2 and 727.9 eV were  
 87 marked as 2 p<sub>3/2</sub> and 2 p<sub>1/2</sub> of Fe<sup>2+</sup> and Fe<sup>3+</sup>, respectively.

88

89

90

91

92

93

94

95

96

97

98

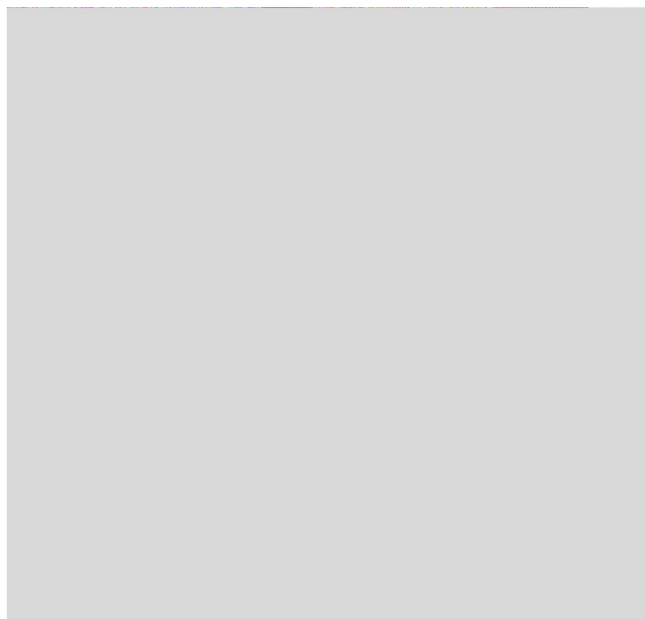

99

100 **Supplementary Fig. 6. Ca 2*p* evolution of spent Fe-CaO/C catalyst**

101

102 In Ca 2*p* spectra, around 351 eV and 347 eV are Ca 2*p*<sub>1/2</sub> and Ca 2*p*<sub>3/2</sub>,  
103 respectively.

104

105

106

107

108

109

110

111

112

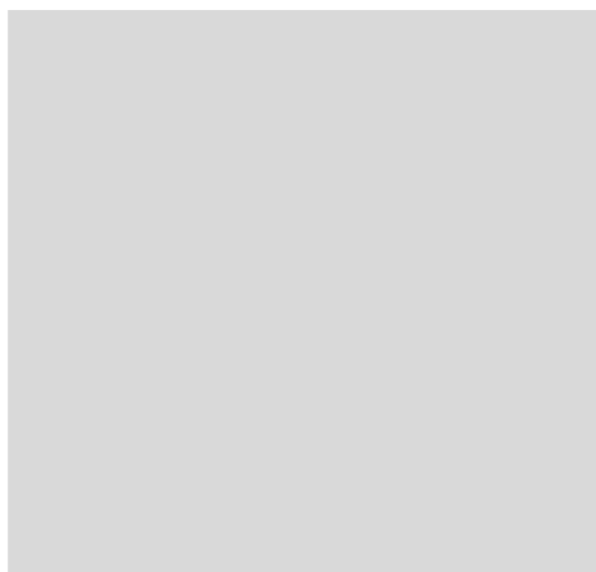

113

114

115 **Supplementary Fig. 7. O 1s evolution of spent Fe-CaO/C catalyst.**

116

117       The O 1s was fitted to the peaks of lattice O ( $O_L$ ), oxygen vacancy ( $O_V$ ) and O-H  
118 bond by Gaussian functions. The calculation of the relative content of each oxygen  
119 species was determined by area integration. The addition of mass ratio (1:2→3:4) the  
120  $O_V$  concentration decreases (78.00%→66.32%).

121

122

123

124

125

126

127

128

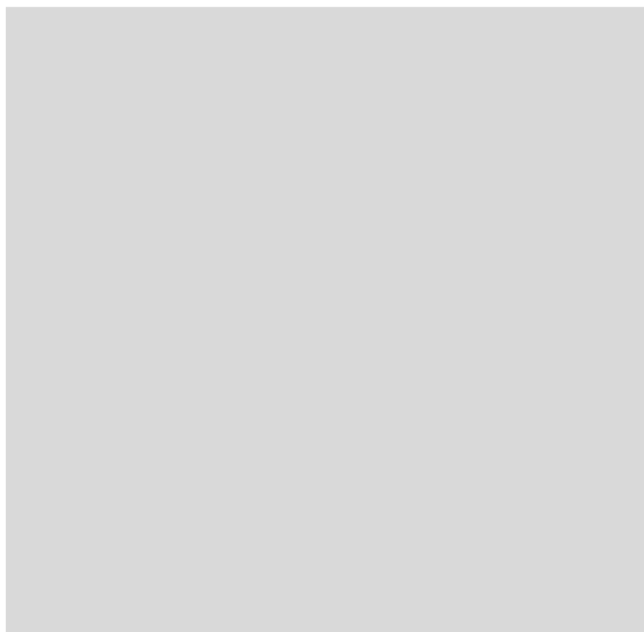

129

130 **Supplementary Fig. 8. C 1s evolution of spent Fe-CaO/C catalyst.**

131

132 The high-resolution C 1s spectra can be assign to C-C, C-C and C-O bonds at  
133 284.2, 285.4 and 288.6 eV, respectively.

134

135

136

137

138

139

140

141

142

143

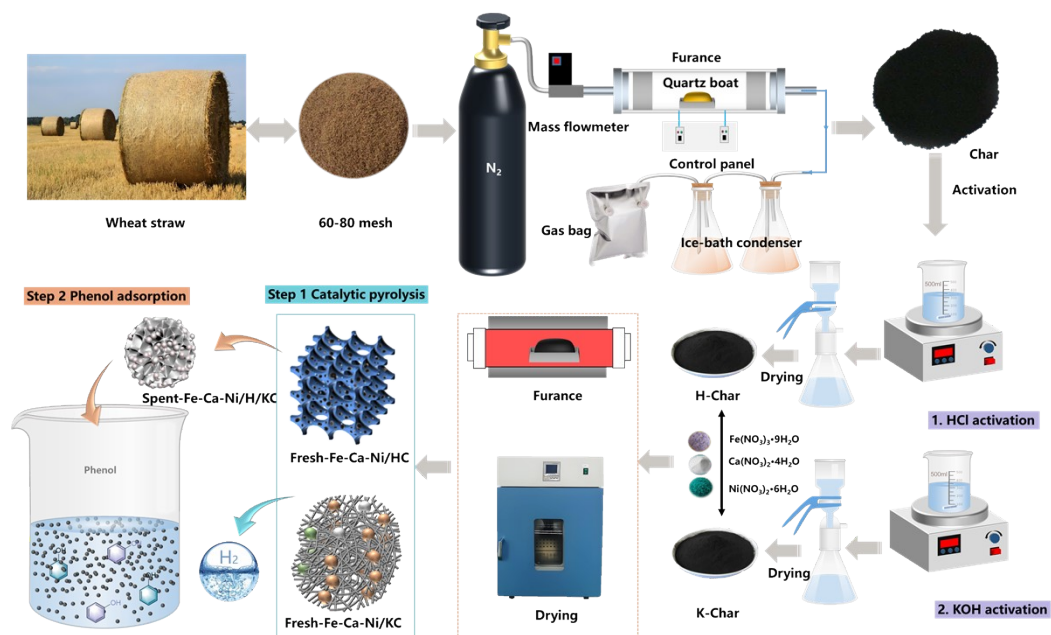

144

145

146 **Supplementary Fig. 9.** Schematic of the preparation process of bio-char and

147 the preparation of catalyst.

148

149

150

151

152

153

154

155

156

157

158

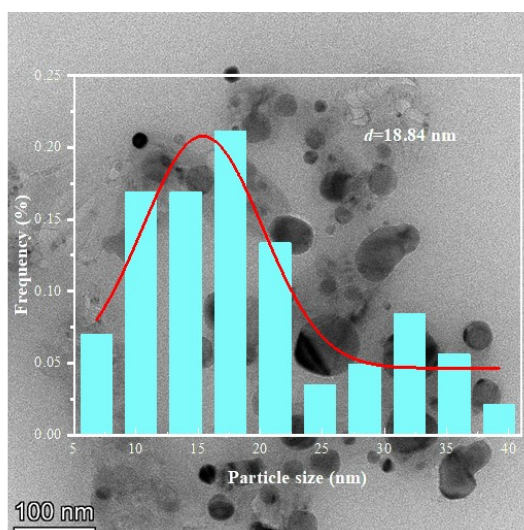

159

160 **Supplementary Fig. 10. Morphology characterizations and particle dimension**

161 **frequency of the fresh catalysts Fe-CaO-Ni/0.2HC fresh catalyst.**

162

163 The smaller, darker particles represent the active component metal oxides, while  
 164 the larger, lighter blocks represent the alloy. The average particle size of the Fe-CaO-  
 165 Ni/0.2HC catalyst is 18.84 nm.

166

167

168

169

170

171

172

173

174

175

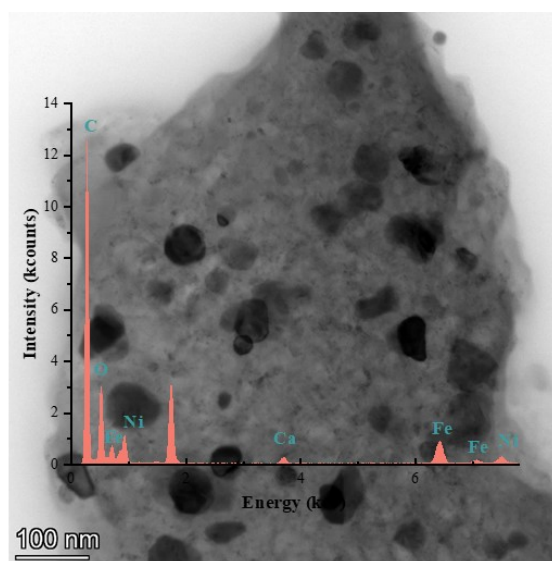

176

177 **Supplementary Fig. 11. surface characterizations and element distribution of the**  
 178 **fresh catalysts Fe-CaO-Ni/0.2HC fresh catalyst.**

179

180 The EDX results show that the catalyst surface contains mainly Fe, Ni, Ca, C and  
 181 O, with no other heterogeneous elements.

182

183

184

185

186

187

188

189

190

191

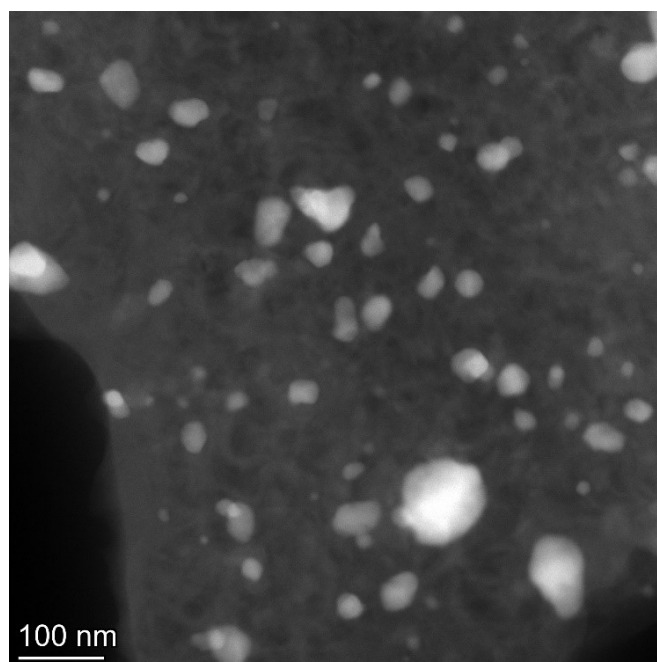

192

193 **Supplementary Fig. 12. TEM dark field image of fresh catalysts Fe-CaO-**  
194 **Ni/0.2HC fresh catalyst.**

195

196 The smaller particles represent the active component metal oxides, while the  
197 larger blocks represent the alloy.

198

199

200

201

202

203

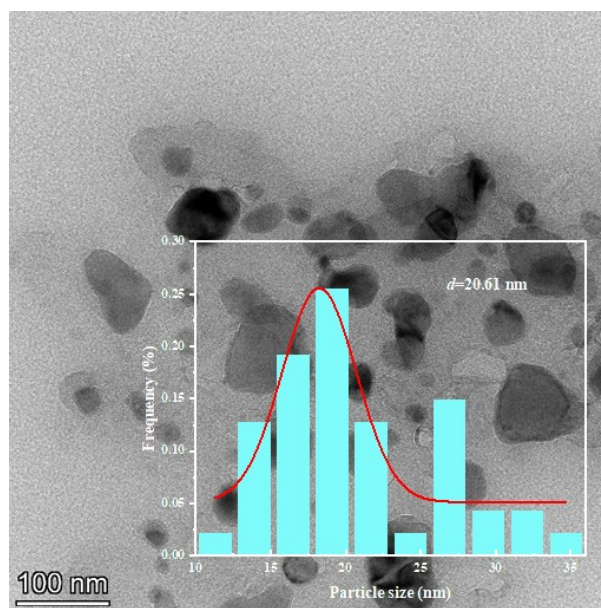

204

205 **Supplementary Fig. 13. Morphology characterizations and particle dimension**  
 206 **frequency of the fresh Fe-CaO-Ni/0.3KC fresh catalyst.**

207

208 Cube-shaped thin layers outside particles are clearly observed on catalyst surface.

209 The average particle size of Fe-CaO-Ni/0.3KC catalyst is 20.61nm, larger than those

210 in Fe-CaO-Ni/O.2HC.

211

212

213

214

215

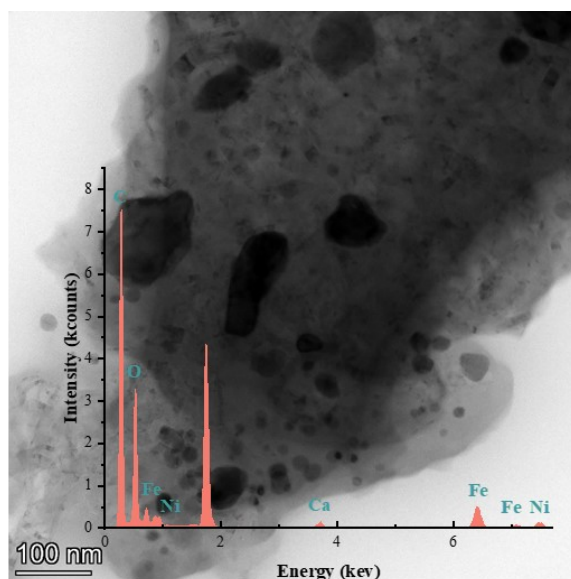

216

217 **Supplementary Fig. 14. surface characterizations and element distribution of the**  
 218 **fresh Fe-CaO-Ni /0.3KC fresh catalyst.**

219

220 Cube-shaped thin layers outside particles are clearly observed on catalyst surface.

221 The EDX results show that the catalyst surface contains mainly Fe, Ni, Ca, C and O,

222 with no other heterogeneous elements.

223

224

225

226

227

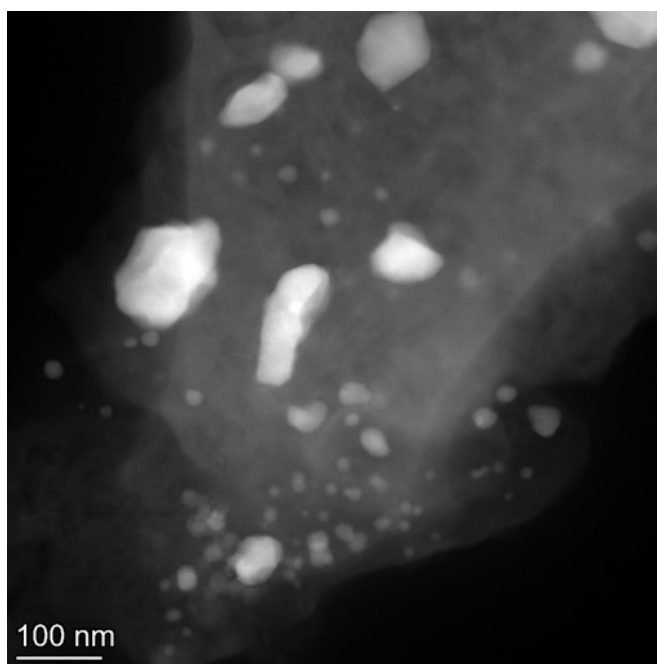

228

229 **Supplementary Fig. 15. TEM dark field image of fresh catalysts Fe-CaO-**  
230 **Ni/0.2HC fresh Fe-CaO-Ni/0.3KC.**

231

232       Cube-shaped thin layers outside particles are clearly observed on catalyst surface.

233

234

235

236

237

238

239

240

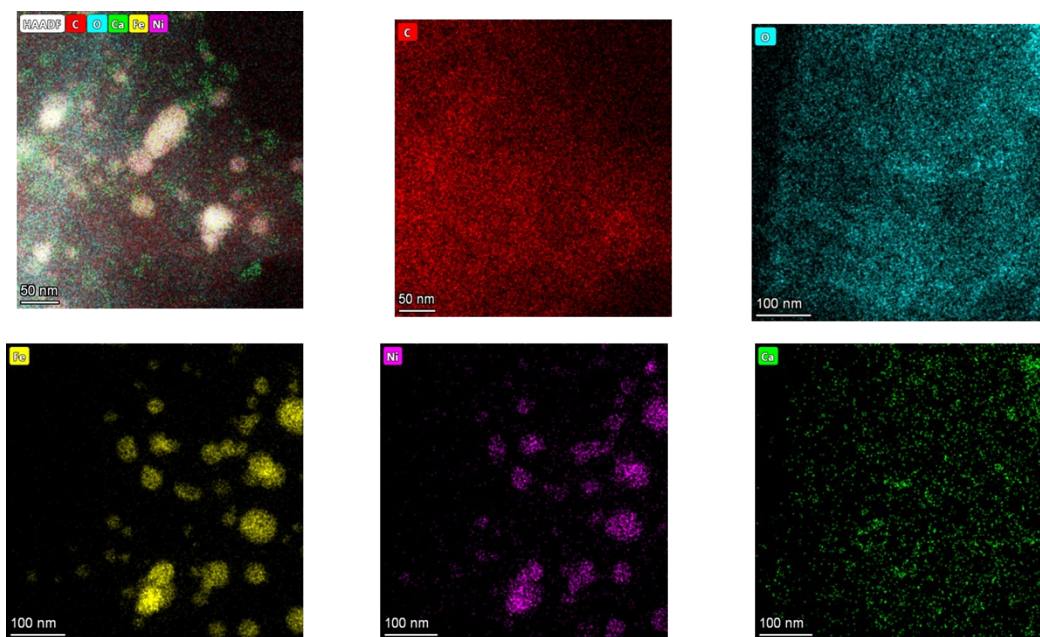

241

242 **Supplementary Fig. 16. elemental mapping images of fresh catalysts Fe-CaO-**  
 243 **Ni/0.3KC.**

244

245 C, O, Fe, Ni and Ca can be observed in the TEM mapping diagram, where the  
 246 positions of Fe and Ni overlap.

247

248

249

250

251

252

253

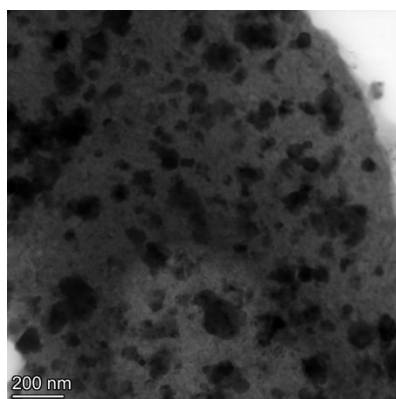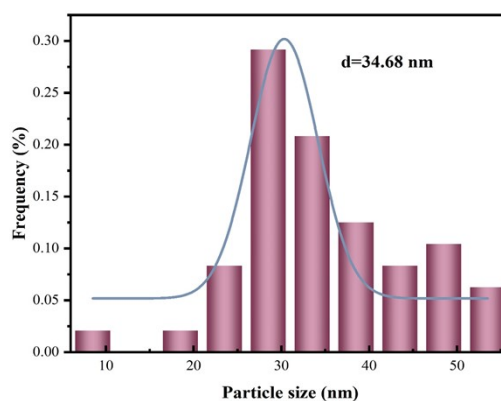

**Supplementary Fig. 17. TEM image and particle distribution of spent Fe-CaO-Ni/0.2HC.**

Dark black particles and carbon film can be seen in TEM image, and the particle size statistics of the particles in the figure yielded that the size of the particles was 34.68 nm, which was larger than that of the fresh catalyst particles.

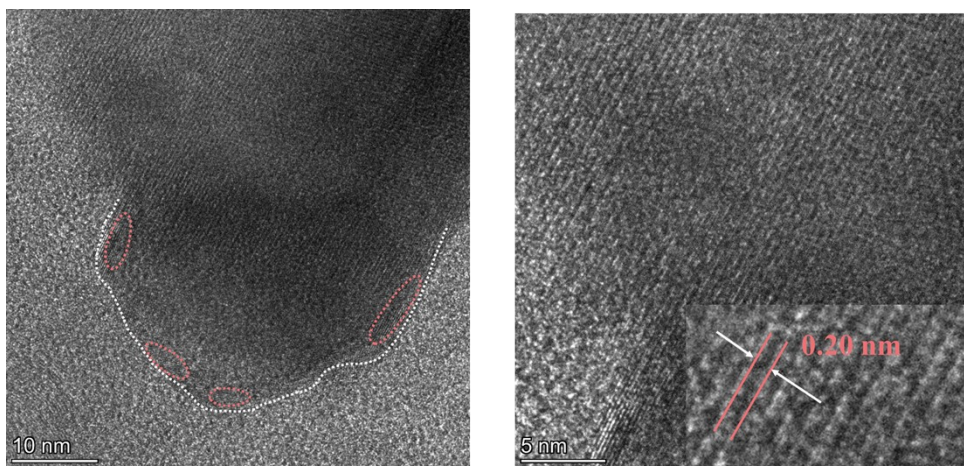

272

273 **Supplementary Fig. 18. High-resolution TEM of spent Fe-CaO-Ni/0.3KC.**

274

275 The presence of carbon cladding with ordered carbon streaks was also  
276 confirmed in the high-resolution TEM images.

277

278

279

280

281

282

283

284

285

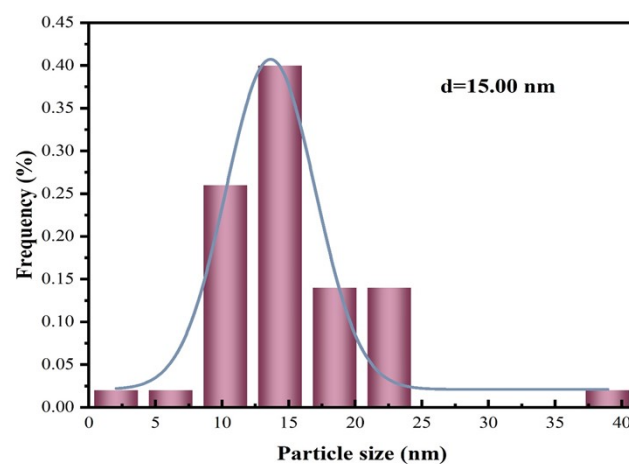

286

287 **Supplementary Fig. 19. Particle distribution of spent Fe-CaO-Ni/0.3KC.**

288

289

290

291

292

293

294

295

296

297

298

299

300

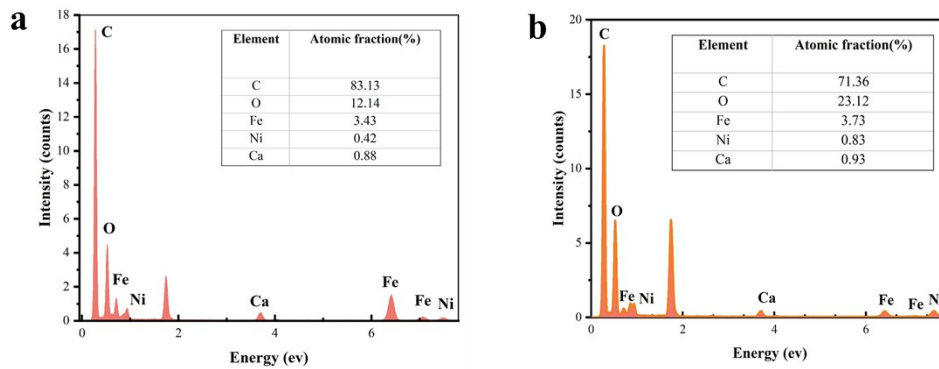

301

302 **Fig. 20. Composition and content of elements in the spent carrier-modified**  
 303 **catalyst (a: Fe-CaO-Ni/0.2HC; b Fe-CaO-Ni/0.3KC).**

304

305

**Table S1.** Proximate and ultimate analyses of the WS.

|      | Proximate analysis (wt%, d) |      |       | Ultimate analysis (wt%, daf) |      |                |      |      |
|------|-----------------------------|------|-------|------------------------------|------|----------------|------|------|
|      | VM                          | A    | FC    | C                            | H    | O <sup>a</sup> | N    | S    |
| WS   | 83.62                       | 8.44 | 7.94  | 47.34                        | 7.13 | 44.35          | 1.02 | 0.16 |
| H-WS | 79.84                       | 3.72 | 16.44 | 51.72                        | 6.49 | 40.59          | 1.13 | 0.07 |

306 VM: volatile matter; A: ash; FC: fixed carbon; d: dry basis; daf: dry ash free basis. a: By  
307 difference.

308

309

310

311

312

**Table S2.** Biomass pyrolysis product distribution in the 500-800 °C temperature

range.

|        | Y <sub>HO</sub> (in wt%<br>of biomass,<br>daf) | Y <sub>Gas</sub> (in wt%<br>of biomass,<br>daf) | Y <sub>Char</sub> (in<br>wt% of<br>biomass,<br>daf) | Y <sub>LO+W</sub> (in<br>wt% of<br>biomass,<br>daf) |
|--------|------------------------------------------------|-------------------------------------------------|-----------------------------------------------------|-----------------------------------------------------|
| 600 °C | 4.94                                           | 29.73                                           | 27.93                                               | 37.40                                               |
| 700 °C | 4.06                                           | 32.78                                           | 27.96                                               | 35.20                                               |
| 800 °C | 1.71                                           | 34.00                                           | 27.99                                               | 36.30                                               |

329

**Table S3.** Textural properties of the catalysts.

| Catalyst             | Surface Area<br>(m <sup>2</sup> /g) | Pore Volume<br>(cm <sup>3</sup> /g) | Average pore<br>diameter (nm) |
|----------------------|-------------------------------------|-------------------------------------|-------------------------------|
| Fresh Fe-Ni-Ca/0.2HC | 727.80                              | 0.599                               | 3.17                          |
| Fresh Fe-Ni-Ca/0.3KC | 904.62                              | 0.598                               | 2.64                          |
| Spent Fe-Ni-Ca/0.3KC | 269.62                              | 0.233                               | 3.45                          |
| Bio-char             | 235.77                              | 0.159                               | 2.70                          |
| AC                   | 947.38                              | 0.515                               | 2.26                          |

330

331

332

333

334

335

336

337

338

339

340

341

342

343

344

345 **Table S4.** Comparison of this work with relevant research on hydrogen  
346 yield and key reaction conditions.

| Feedstock                | Temperature<br>(°C) | Catalyst          | Hydrogen<br>content (mL/g) | Ref.             |
|--------------------------|---------------------|-------------------|----------------------------|------------------|
| Hemicellulose            | 800                 | -                 | 136.42                     | 1                |
| Biomass tar              | 900                 | Ni-Fe/ASA@HZSM-5  | 110.5                      | 2                |
| Wheat straw              | 750                 | Fe/Char           | 81.39                      | 3                |
| Wheat straw              | 650                 | Ni-Co-Mn          | 59.58                      | 4                |
| Biomass                  | 923                 | CaCO <sub>3</sub> | 308                        | 5                |
| Chinese herb<br>residues | 700                 | K-Fe              | 135.36                     | 6                |
| Pine sawdust             | 600                 | Ni-Ce/C9A3(AN-CF) | 294.31                     | 7                |
| Wheat straw              | 600                 | Fe-Ni-Ca/Char     | 345                        | <b>This work</b> |

347 **References:**

- 348 1. G. Chen, W. Du, J. Cai, J. Li, J. Tao, M. Irfan Rajput, B. Yan, Z. Wang, *Applications in*  
349 *Energy and Combustion Science*, 2025, **24**, 100381.
- 350 2. X. Li, Z. Wang, Y. Zhang, W. Zhang, H. Zhang, P. Liu, T. Lei, *Journal of Environmental*  
351 *Management*, 2025, **389**, 126016.
- 352 3. Y. Shi, W. Zhao, M. Tahir, E. Lora, A. N. Kozlov, M. V. Penzik, Y. Zhang, S. Zhang, *Journal*  
353 *of Analytical and Applied Pyrolysis*, 2026, **194**, 107539.
- 354 4. M. Xu, Z. Shi, X. Zhu, Y. Lai, A. Xia, Y. Huang, X. Jiang, J. He, M. Zhou, X. Zhu, Q. Liao,  
355 *International Journal of Hydrogen Energy*, 2024, **52**,83-96.
- 356 5. R.D. Gomez Vásquez, J. D. Rhenals-Julio, J. M. Mendoza, J. Acevedo, A. Silvera, *Applied*  
357 *Thermal Engineering*, 2025, **272**, 126454.
- 358 6. Y. Li, Z. Guo, H. Zhu, F. Wang, L. Lang, X. Yin, C. Wu, *International Journal of Hydrogen*  
359 *Energy*, 2025, **196**, 152543.
- 360 7. C. Wei, X. Zeng, X. Wang, Z. Jian, G. Hao, C. Xiao, D. Gong, *Journal of the Energy Institute*,  
361 2025, **123**, 102328.

366

**Table S5.** ICP result of bio-char

| Content<br>(wt%) | Si   | Al   | Ca   | Fe   | K    | Mg   | Na   |
|------------------|------|------|------|------|------|------|------|
| Bio-char         | 1.04 | 0.06 | 1.36 | 0.09 | 2.09 | 0.33 | 0.12 |

367

.

368

369

370

371

372

373

374

375
